# Supplementary material
Source: publisher site journal article supplement (https://www.dovepress.com/get_supplementary_file.php?f=321704.docx)
Supplement: Supplementary file 1 [file get_supplementary_file.php]

**Table S1** Primers used to detect the resistance and virulence-associated genes in this study

| Target genes | Primer name | Primer sequence (5’–3’) | Product size (bp) |
| --- | --- | --- | --- |
| blaKPC | KPC-F | ATGTCACTGTATCGCCGTCT | 893 |
| KPC-R | TTTTCAGAGCCTTACTGCCC |
| blaNDM | NDM-F | GGTTTGGCGATCTGGTTTTC | 624 |
| NDM-R | CGGAATGGCTCATCACGATC |
| blaVIM | VIM-F | GATGGTGTTTGGTCGCATA | 390 |
| VIM-R | CGAATGCGCAGCACCAG |
| blaIMP | IMP-F | GGAATAGAGTGGCTTAAYTCTC | 188 |
| IMP-R | GGTTTAAYAAAACAACCACC |
| blaOXA48 | OXA48-F | GCGTGGTTAAGGATGAACAC | 437 |
| OXA48-R | CATCAAGTTCAACCCAACCG |
| blaSHV | SHV-F | GCCTTTATCGGCCTTCACTCAAG | 898 |
| SHV-R | TTAGCGTTGCCAGTGCTCGATCA |
| blaTEM | TEM-F | CATTTCCGTGTCGCCCTTATTC | 800 |
| TEM-R | CTCAGTGCTCTACAGAAAACC |
| blaCTX-M-1 group | CTX-M-1-F | CAGCGCTTTTGCCGTCTAAG | 944 |
| CTX-M-1-R | GGCCCATGGTTAAAAAATCACTGC |
| blaCTX-M-2 group | CTX-M-2-F | GCATTCGCCGCTCAATGTTA | 942 |
| CTX-M-2-R | GGTTCGTTGCAAGACAAGAC |
| blaCTX-M-8 group | CTX-M-8-F | ACTTCAGCCACACGGATTCA | 977 |
| CTX-M-8-R | CGAGTACGTCACGACGACTT |
| blaCTX-M-9 group | CTX-M-9-F | GTTACAGCCCTTCGGCGATGATTC | 877 |
| CTX-M-9-R | GCGCATGGTGACAAAGAGAATGCAA |
| allS | allS-F | CCGAAACATTACGCACCTTT | 508 |
| allS-R | ATCACGAAGAGCCAGGTCAC |
| fimH | fimH-F | TGCTGCTGGGCTGGTCGATG | 609 |
| fimH-R | GGGAGGGTGACGGTGACATC |
| mrkD | mrkD-F | AAGCTATCGCTGTACTTCCGGCA | 340 |
| mrkD-R | GGCGTTGGCGCTCAGATAGG |
| aerobactin | aerobactin-F | GCATAGGCGGATACGAACAT | 556 |
| aerobactin-R | CACAGGGCAATTGCTTACCT |
| entB | entB-F | GTCAACTGGGCCTTTGAGCCGTC | 400 |
| entB-R | TATGGGCGTAAACGCCGGTGAT |
| rmpA2 | rmpA2-F | TGTGCAATAAGGATGTTACATTAGT | 609 |
| rmpA2-R | TTTGATGTGCACCATTTTTCA |
| rmpA | rmpA-F | CATAAGAGTATTGGTTGACAG | 429 |
| rmpA-R | CTTGCATGAGCCATCTTTCA |
| iutA | iutA-F | GGGAAAGGCTTCTCTGCCAT | 880 |
| iutA-R | TTATTCGCCACCACGCTCTT |
| iucA | iucA-F | AATCAATGGCTATTCCCGCTG | 239 |
| iucA-R | CGCTTCACTTCTTTCACTGACAGG |
| ERIC | ERIC-F | ATGTAAGCTCCTGGGGATTCAC | NA |
| ERIC-R | AAGTAAGTGACTGGGGTGAGCG |
| wzi | wzi_for2 | GTG CCGCGAGCGCTT TCTATCTTGGTATTCC | NA |
| wzi_rev | GAGAGCCACTGGTTCCAGAATTACCGC |
